# Supplementary material
Source: Springer Nature journal article supplement (https://www.springermedizin.de/resource/supplementary/12974_2013_971_MOESM3_ESM.pdf/9600516)
Supplement: MOESM3 [file 9600516]

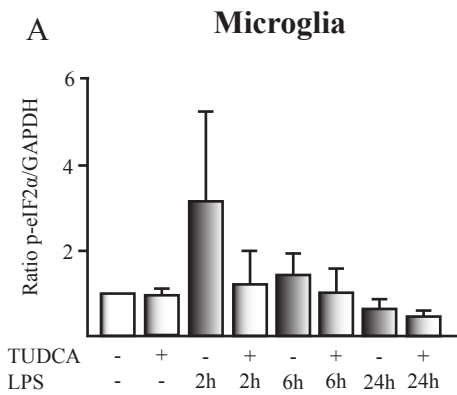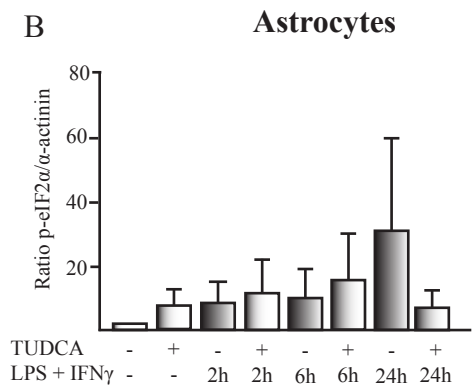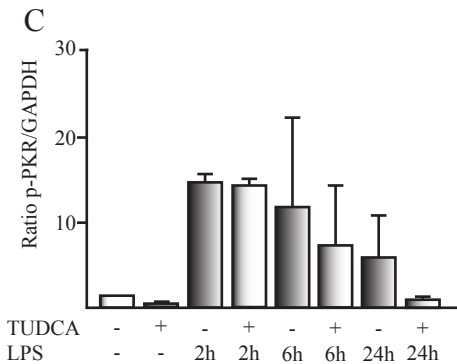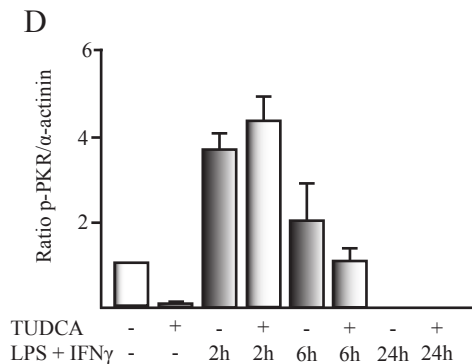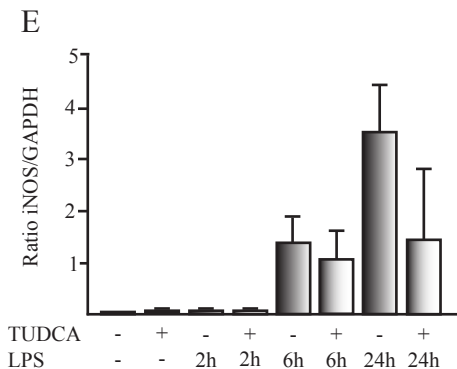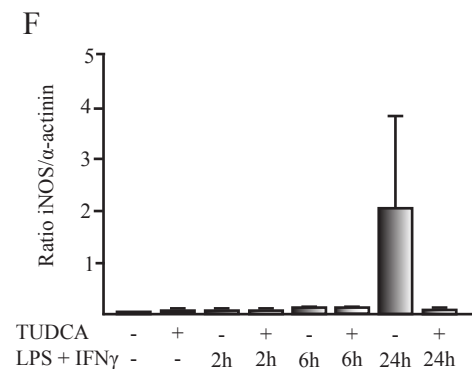

**Additional file A3: TUDCA regulates the activation of NF $\kappa$ B proinflammatory pathway.** We studied the expression of iNOS and the phosphorylation level of eIF2 $\alpha$  and PKR. In microglial cells, TUDCA downregulates the phosphorylation of eIF2 $\alpha$  after 2h of induction with LPS (A), it does not affect the phosphorylation of PKR (C), and reduces the iNOS expression at 24h (E). In astrocytes, TUDCA reduces the phosphorylation of eIF2 $\alpha$  at 24h after LPS treatment (B), PKR phosphorylation is not affected by TUDCA (D), and iNOS expression is also reduced at the same time point as microglia. The bar graphs represent the mean of the densitometry of the bands  $\pm$  SEM of the phosphorylated form (for eIF2 $\alpha$  and PKR) or iNOS protein expression normalized to the loading control (GAPDH for microglia and  $\alpha$ -actinin for astrocytes) for 3 independent experiments.
